# Supplementary material for: Formulation of Sodium Valproate Nanospanlastics as a Promising Approach for Drug Repurposing in the Treatment of Androgenic Alopecia
Source: PubMed Central journal article supplement (PMC7559423; doi:10.3390/pharmaceutics12090866), 2020-09-11
Supplement: pharmaceutics-12-00866-s001.pdf [file pharmaceutics-12-00866-s001.pdf]

# Supplementary Materials: Formulation of Sodium Valproate Nanospanlastics as a Promising Approach for Drug Repurposing in the Treatment of Androgenic Alopecia

F. A. Badria \*, Hassan A. Fayed, Amira K. Ibraheem, Ahmed F. State and Eman A. Mazyed

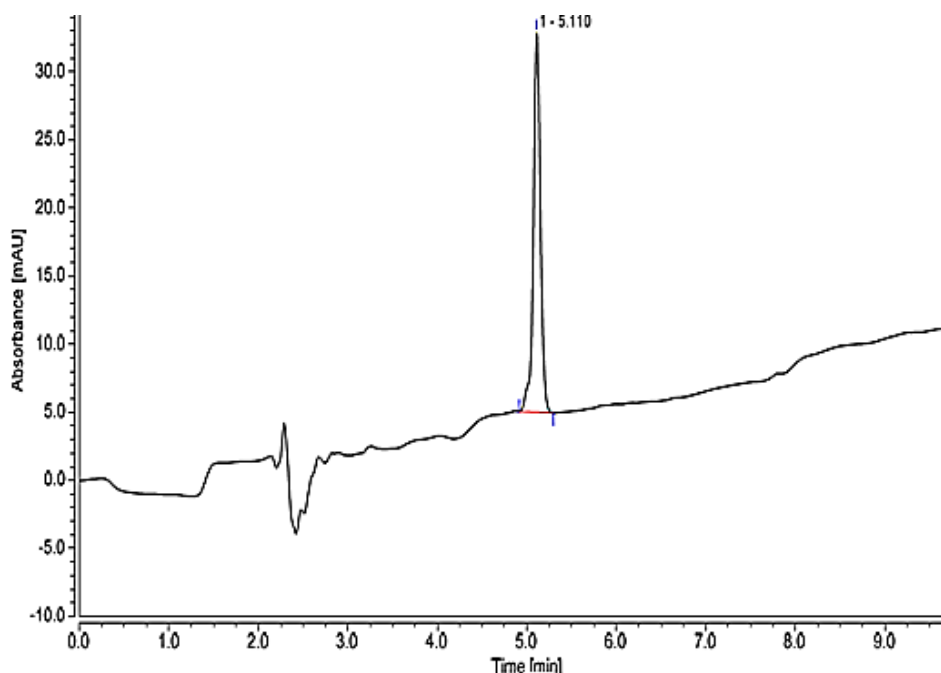

Figure S1. HPLC chromatogram of SV. Abbreviations: SV, sodium valproate.

Table S1. Prescreening study for formulation of SV-loaded SNVs.

| Formula | Span 60 to EA ratio | Type of EA   | Rotation speed (rpm) | EE %       |
|---------|---------------------|--------------|----------------------|------------|
| P1      | 50:50               | Cremophor RH | 500                  | 70.33±1.20 |
| P2      | 60:40               | Cremophor RH | 500                  | 82.30±0.98 |
| P3      | 80:20               | Cremophor RH | 500                  | 97.68±1.93 |
| P4      | 50:50               | Tween 80     | 500                  | 67.22±1.41 |
| P5      | 60:40               | Tween 80     | 500                  | 79.44±1.15 |
| P6      | 80:20               | Tween 80     | 500                  | 95.53±1.46 |
| P7      | 50:50               | Brij 35      | 500                  | 59.22±1.61 |
| P8      | 60:40               | Brij 35      | 500                  | 69.23±1.25 |
| P9      | 80:20               | Brij 35      | 500                  | 86.13±1.33 |
| P10     | 50:50               | Cremophor RH | 1000                 | 64.60±1.24 |
| P11     | 60:40               | Cremophor RH | 1000                 | 79.48±1.33 |
| P12     | 80:20               | Cremophor RH | 1000                 | 93.34±0.92 |
| P13     | 50:50               | Tween 80     | 1000                 | 60.50±1.27 |
| P14     | 60:40               | Tween 80     | 1000                 | 70.18±0.62 |
| P15     | 80:20               | Tween 80     | 1000                 | 90.32±2.18 |
| P16     | 50:50               | Brij 35      | 1000                 | 55.63±1.33 |

|     |       |              |      |            |
|-----|-------|--------------|------|------------|
| P17 | 60:40 | Brij 35      | 1000 | 65.39±1.22 |
| P18 | 80:20 | Brij 35      | 1000 | 80.12±1.18 |
| P19 | 50:50 | Cremophor RH | 1500 | 57.22±1.13 |
| P20 | 60:40 | Cremophor RH | 1500 | 70.18±1.44 |
| P21 | 80:20 | Cremophor RH | 1500 | 90.08±2.11 |
| P22 | 50:50 | Tween 80     | 1500 | 52.33±1.14 |
| P23 | 60:40 | Tween 80     | 1500 | 64.22±1.28 |
| P24 | 80:20 | Tween 80     | 1500 | 87.14±1.65 |
| P25 | 50:50 | Brij 35      | 1500 | 47.18±1.14 |
| P26 | 60:40 | Brij 35      | 1500 | 60.07±1.38 |
| P27 | 80:20 | Brij 35      | 1500 | 76.19±1.29 |

Notes: All formulations contained 8.3% SV; different values are expressed as mean  $\pm$  SD ( $n = 3$ ); 50:50 ratio involves using 50 mg Span 60 and 50 mg EA; 60:40 ratio involves using 60 mg Span 60 and 40 mg EA; 80:20 ratio involves using 80 mg Span 60 and 40 mg EA. Abbreviations: EE, entrapment efficiency; SV-loaded SNVs, Sodium valproate-loaded spanlastic nano-vesicles.

**Table S2.** Determination of the elasticity of SV-loaded SNVs and the corresponding niosomes.

| Formula  | PS before extrusion (nm) | PS after extrusion(nm) | DI              |
|----------|--------------------------|------------------------|-----------------|
| F8       | 222.9 $\pm$ 2.39         | 210.5 $\pm$ 1.88       | 22.57 $\pm$ 1.5 |
| Niosomes | 293.6 $\pm$ 1.33         | 44.93 $\pm$ 1.55       | 0.98 $\pm$ 0.03 |

Notes: F8, the optimized SV-loaded SNVs; the values are expressed as mean  $\pm$  SD;  $n = 3$ . Abbreviations: EA, edge activator; DI, deformability index; PS, particle size.

**Table S3.** The correlation between the hair follicles number/cm<sup>2</sup> in the studied groups.

| Duration                | SV-loaded SNVs ( $n = 40$ ) | Minoxidil ( $n = 40$ ) | $p$ -value |
|-------------------------|-----------------------------|------------------------|------------|
| Pretreatment            | 17.9 $\pm$ 2.1              | 18.3 $\pm$ 2.75        | 0.358      |
| 1 month after treatment | 17.2 $\pm$ 1.28             | 14.4 $\pm$ 1.98        | 0.047      |
| 2 month after treatment | 16.76 $\pm$ 2.07            | 13.1 $\pm$ 2.51        | 0.031      |
| 3 month after treatment | 19.45 $\pm$ 4.03            | 19.97 $\pm$ 4.18       | 0.593      |
| 4 month after treatment | 26.27 $\pm$ 4.97            | 25.55 $\pm$ 5.12       | 0.328      |
| 5 month after treatment | 29.19 $\pm$ 5.28            | 30.87 $\pm$ 6.11       | 0.314      |
| 6 month after treatment | 31.58 $\pm$ 6.49            | 32.54 $\pm$ 6.39       | 0.286      |

Notes: P-value less than 0.05 indicate model terms are significant. Abbreviations: SV, sodium valproate; SNVs, spanlastic nanovesicles; P- value, probability value.

**Table S4.** The correlation between the hair shaft diameter ( $\mu\text{m}$ ) in the studied groups.

| Duration                | SV-loaded SNVs ( $n = 40$ ) | Minoxidil ( $n = 40$ ) | $p$ -value |
|-------------------------|-----------------------------|------------------------|------------|
| Pretreatment            | 51.5 $\pm$ 5.27             | 50.7 $\pm$ 5.44        | 0.371      |
| 1 month after treatment | 42.9 $\pm$ 4.28             | 43.2 $\pm$ 4.52        | 0.482      |
| 2 month after treatment | 43.18 $\pm$ 3.98            | 43.9 $\pm$ 3.89        | 0.539      |
| 3 month after treatment | 46.17 $\pm$ 4.03            | 47.27 $\pm$ 4.83       | 0.294      |
| 4 month after treatment | 57.9 $\pm$ 6.94             | 56.35 $\pm$ 5.83       | 0.271      |
| 5 month after treatment | 59.36 $\pm$ 5.29            | 60.27 $\pm$ 4.39       | 0.287      |
| 6 month after treatment | 62.4 $\pm$ 7.54             | 63.19 $\pm$ 7.49       | 0.483      |

Notes: P-value less than 0.05 indicate model terms are significant. Abbreviations: SV, sodium valproate; SNVs, spanlastic nanovesicles; P- value, probability value.

**Table S5.** The correlation between the hair density/cm<sup>2</sup> in the studied groups.

| Duration | SV-loaded SNVs ( $n = 40$ ) | Minoxidil | $p$ -value |
|----------|-----------------------------|-----------|------------|
|----------|-----------------------------|-----------|------------|

|                         | <b>(n = 40)</b> |                |       |
|-------------------------|-----------------|----------------|-------|
| Pretreatment            | 143.2 ± 10.11   | 146.04 ± 11.23 | 0.129 |
| 1 month after treatment | 130.27 ± 12.28  | 131.94 ± 13.55 | 0.366 |
| 2 month after treatment | 144.27 ± 18.31  | 142.07 ± 18.69 | 0.157 |
| 3 month after treatment | 153.77 ± 21.62  | 155.39 ± 22.65 | 0.163 |
| 4 month after treatment | 184.53 ± 20.59  | 186.28 ± 21.65 | 0.148 |
| 5 month after treatment | 190.15 ± 23.77  | 193.27 ± 22.36 | 0.116 |
| 6 month after treatment | 191.26 ± 24.72  | 197.71 ± 26.23 | 0.059 |

Notes: P-value less than 0.05 indicate model terms are significant. Abbreviations: SV, sodium valproate; SNVs, spanlastic nanovesicles; P- value, probability value.

**Table S6.** Side effects among the studied groups.

| <b>Side effects</b>   | <b>SV-loaded SNVs (n = 40)</b> | <b>Minoxidil (n = 40)</b> | <b>P-value</b> |
|-----------------------|--------------------------------|---------------------------|----------------|
| Initial shedding      | 5 (12.5%)                      | 32 (80%)                  | <0.001         |
| Irritation            | 4 (10%)                        | 12 (30%)                  | 0.005          |
| Facial hypertrichosis | 0 (0%)                         | 3 (7.5%)                  | 0.128          |
| Dandruff              | 2 (5%)                         | 1 (2.5%)                  | 0.322          |

Notes: P-value less than 0.05 indicate model terms are significant. Abbreviations: SV, sodium valproate; SNVs, spanlastic nanovesicles; P- value, probability value.
